# Supplementary material for: Green microwave switching from oxygen rich yellow anatase to oxygen vacancy rich black anatase TiO2 solar photocatalyst using Mn(ii) as ‘anatase phase purifier’
Source: Royal Society of Chemistry journal article supplement (doi:10.1039/c5nr05975e), 2015-01-01
Supplement: c5nr05975e1.pdf [file c5nr05975e1.pdf]

## Electronic Supplementary Information

### Green Microwave Switching from Oxygen Rich Yellow Anatase TiO<sub>2</sub> to Oxygen Vacancy Rich Black Anatase TiO<sub>2</sub> Photocatalyst Using Mn (II) as ‘Anatase Phase Purifier’

Sanjay G. Ullattil, Pradeepan Periyat\*

*Department of Chemistry, University of Calicut, Kerala, India – 673635*

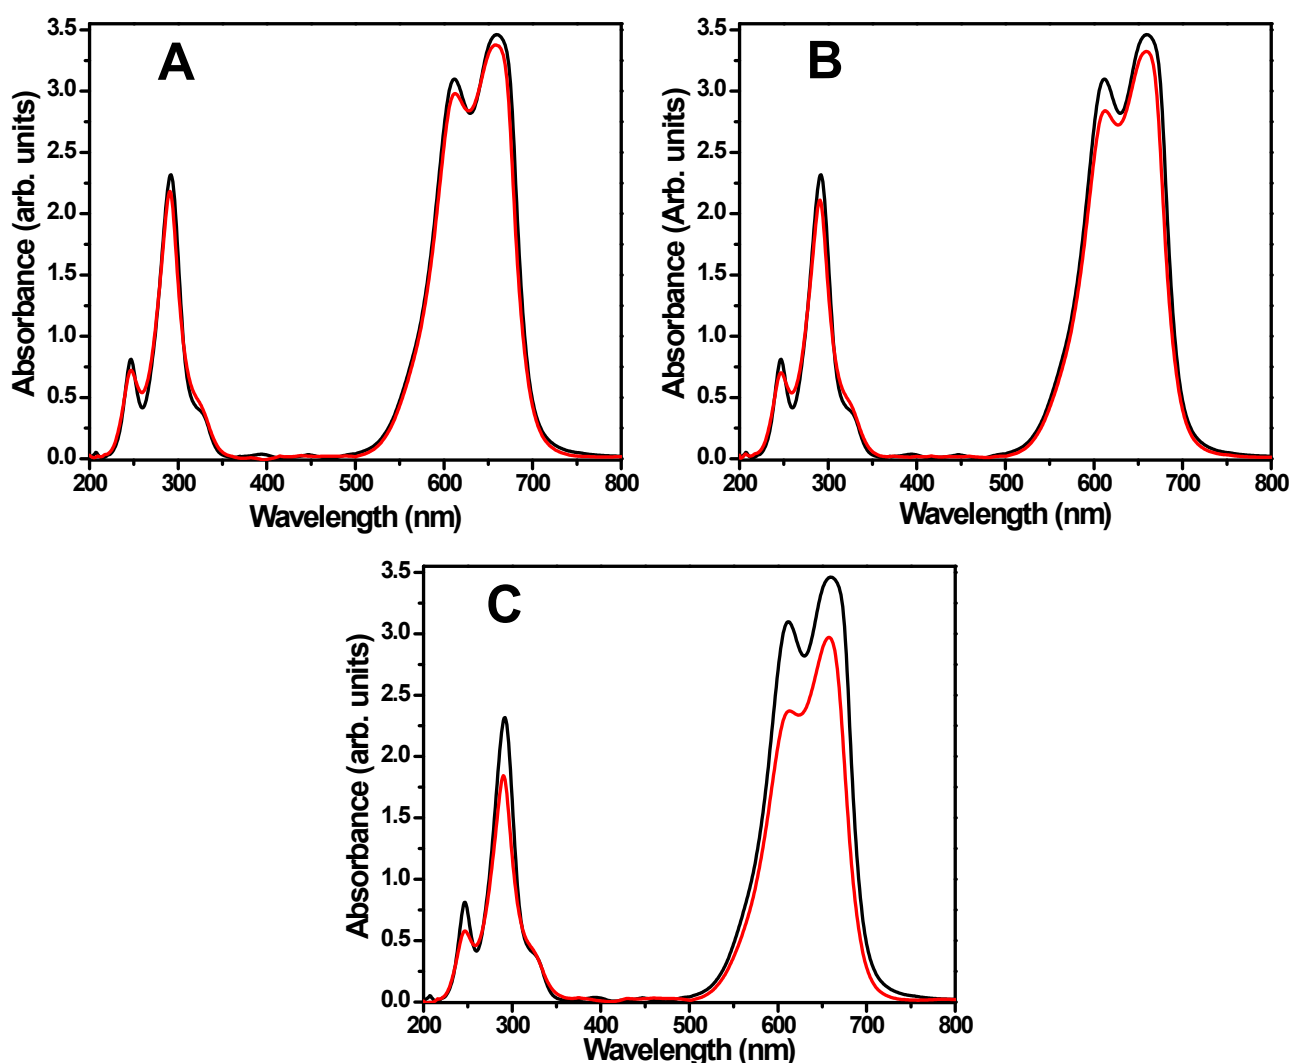

Figure S1. UV-Visible spectra of dark adsorption analysis using A) YAT-150 B) BAT-150 and C) Degussa-P25 ( black line - before adsorption, red line – after adsorption)

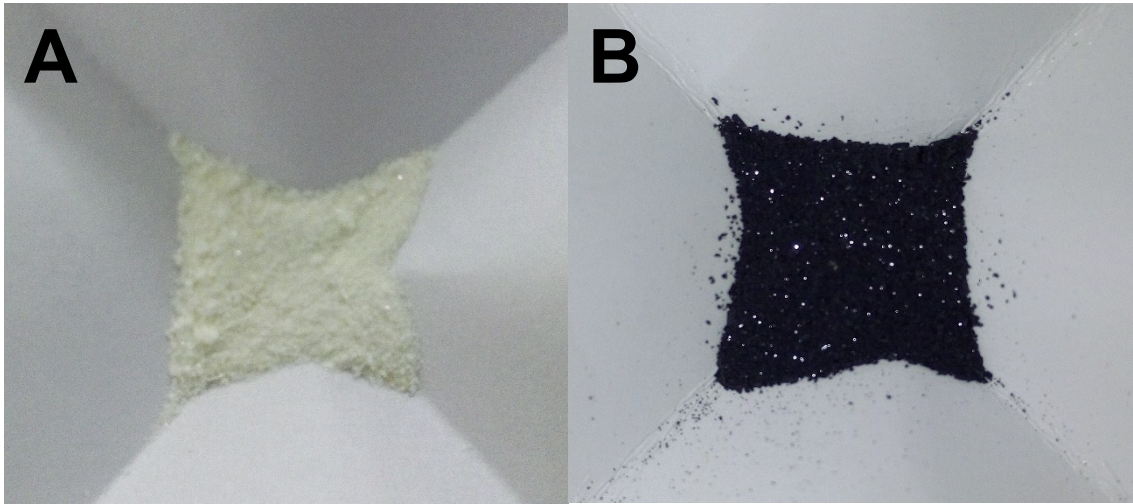

Figure S2. Digital photographs of A) Yellow anatase titania (YAT-150) and B) Black anatase titania (BAT-150)

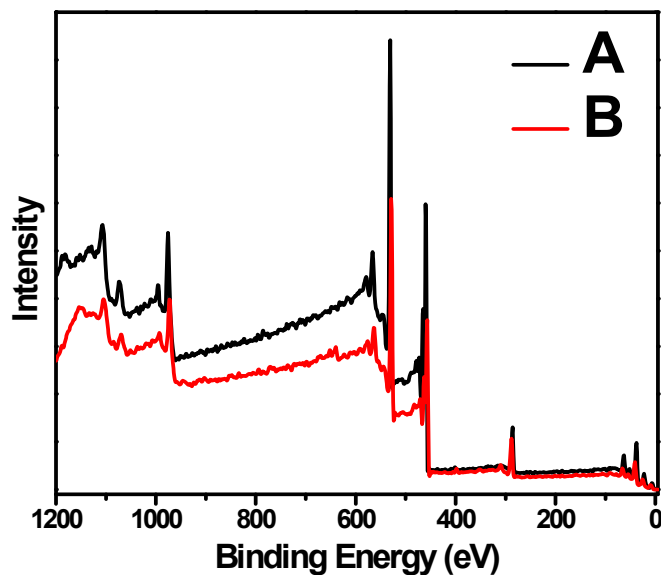

Figure S3. Wide area XPS of A) yellow anatase titania (YAT-150) and B) black anatase titania (BAT-150)

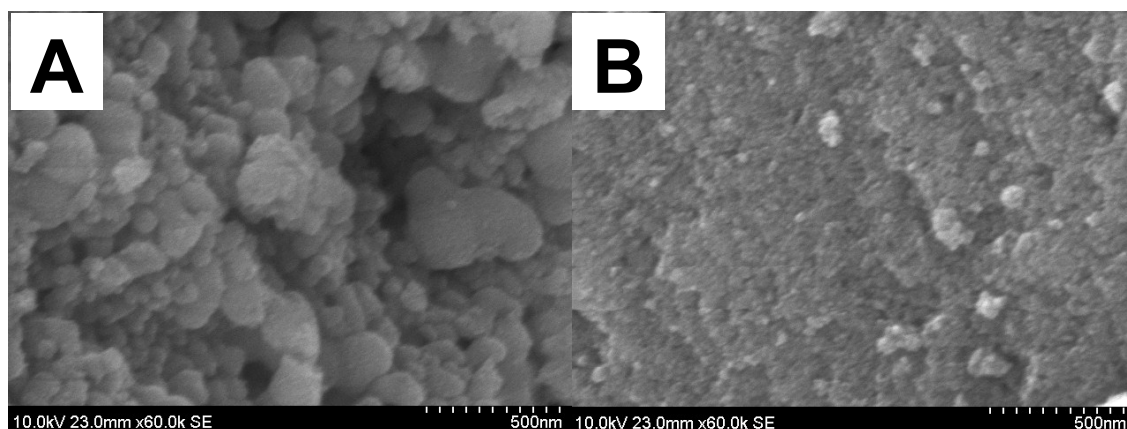

**Figure S4. SEM images of A) Yellow anatase titania (YAT-150) and B) Black anatase titania (BAT-150)**

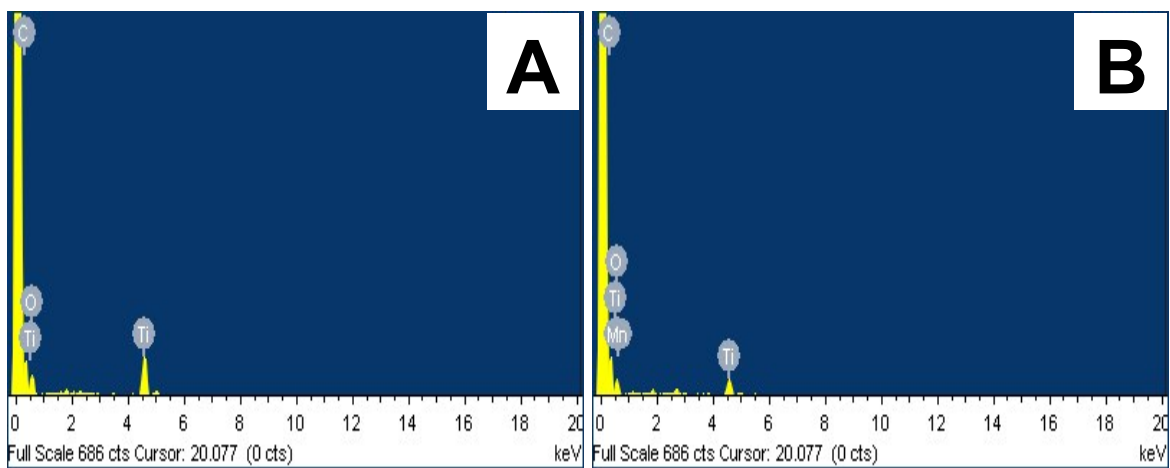

Figure S5. EDX of A) Yellow anatase titania (YAT-150) and B) Black anatase titania (BAT-150)

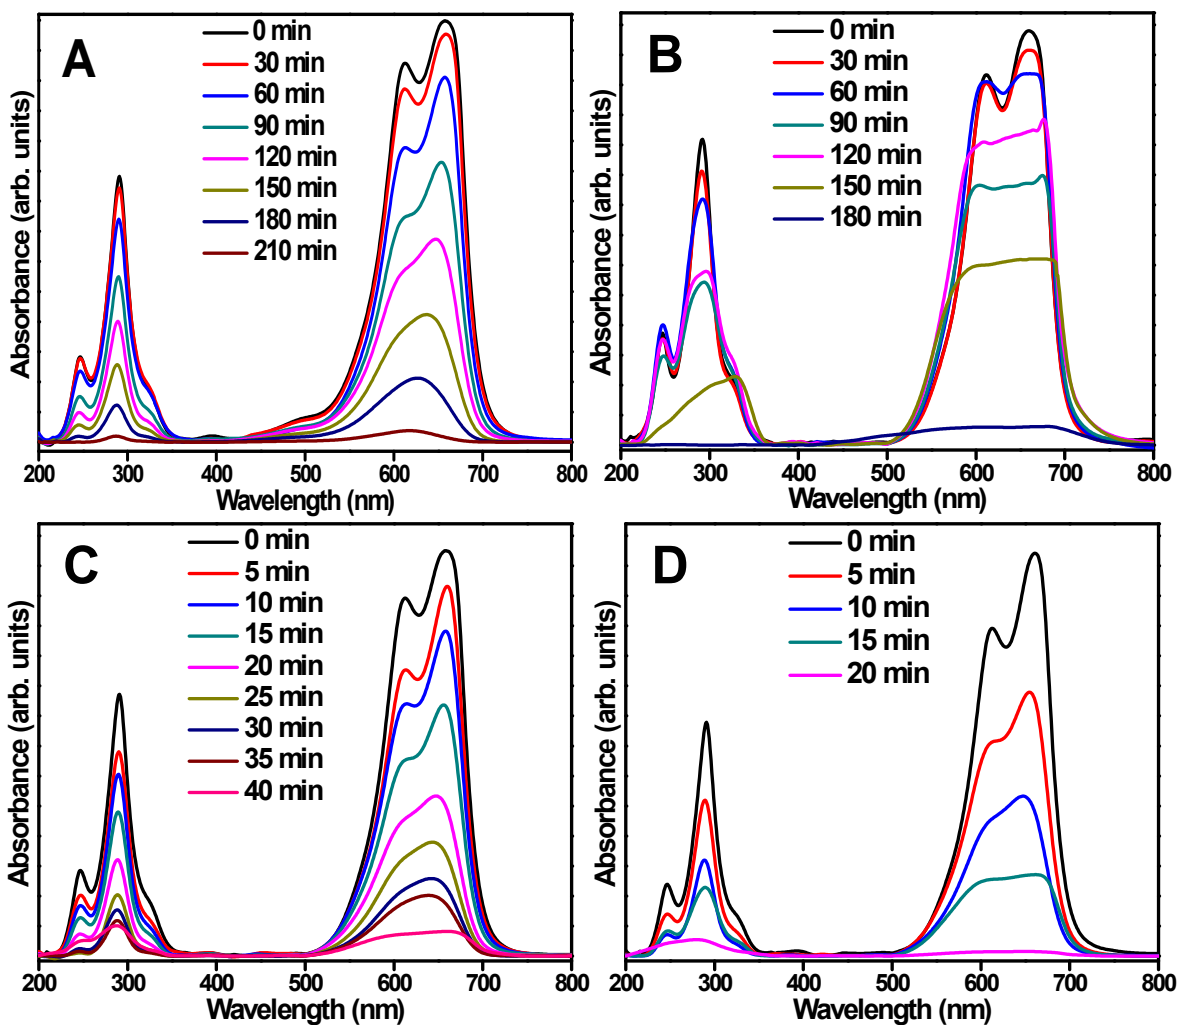

Figure S6. UV-Visible spectra of photodegradation under UV illumination using A) YAT-150, B) BAT-150 and under sunlight illumination using C) YAT-150, D) BAT-150.

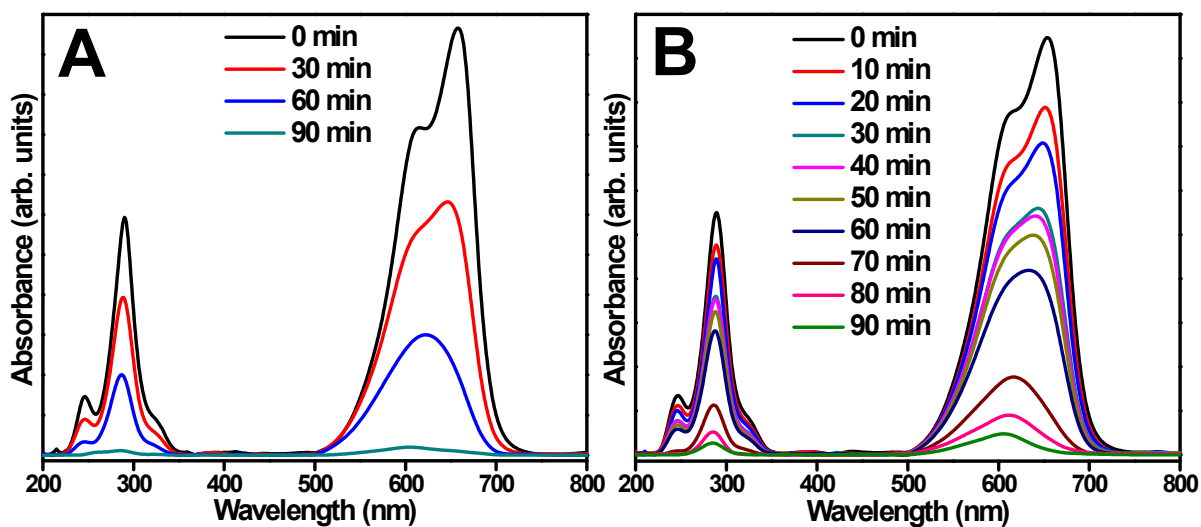

Figure S7. UV-Visible spectra of photodegradation using Degussa-P25 A) under UV illumination and B) under sunlight illumination.
